# Supplementary material for: Spatial Distribution of Non-Immune Cells Expressing Glycoprotein A Repetitions Predominant in Human and Murine Metastatic Lymph Nodes
Source: MDPI journal article supplement (doi:10.3390/cancers15235621), 2023-11-28
Supplement: s1 [file s1]

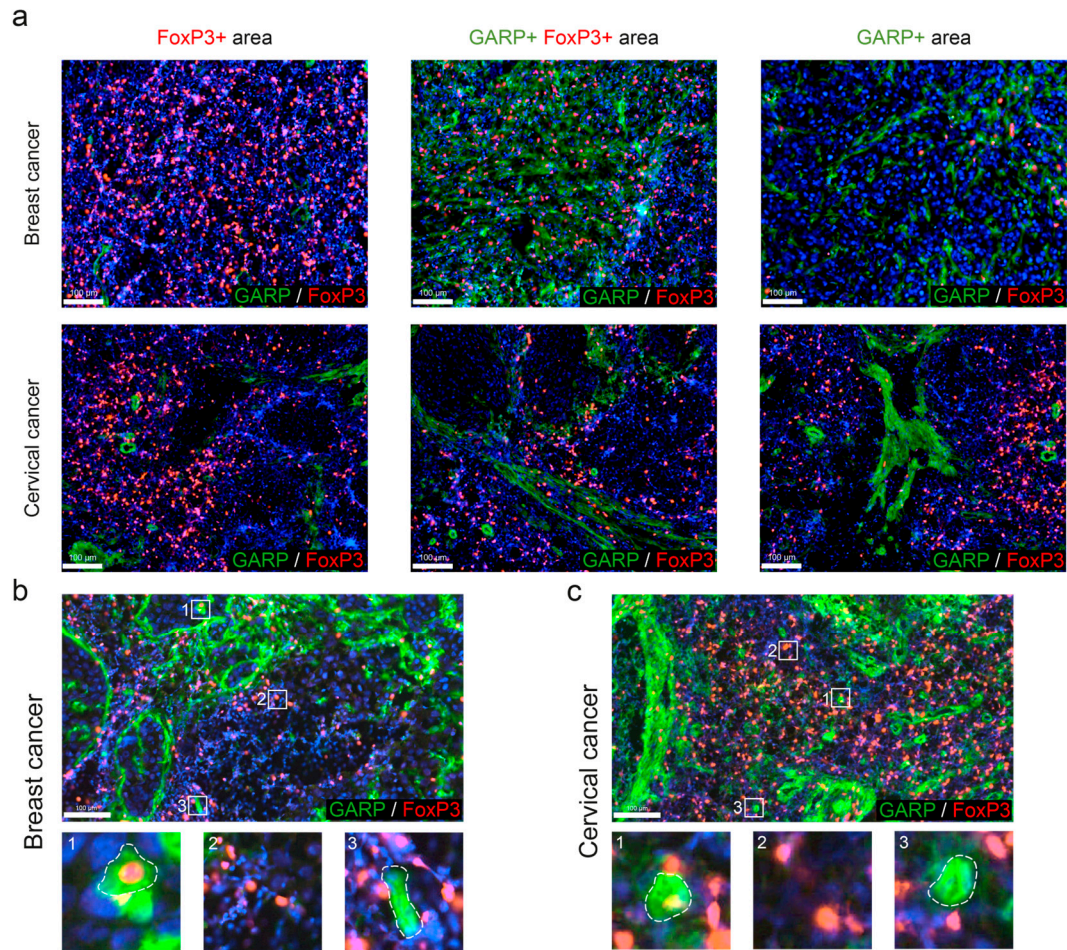

**Figure S1. Multiplex immunofluorescence identifies GARP expression by Tregs and non-Tregs in human LN.** (a) Dual-plex immunofluorescence staining of GARP (in green), FOXP3 (in red), and nuclei (DAPI, in blue) on MLN+ from patients with breast cancer or cervical cancer. (b, c) Focus on FoxP3/GARP pattern, scale bar = 100  $\mu$ m and higher magnification of (1) GARP+/FOXP3 cells, (2) GARP-/FOXP3+ cells, and (3) GARP+/FOXP3- cells in (b) breast cancer or (c) cervical cancer.
